# Supplementary material
Source: PubMed Central journal article supplement (PMC8319197)
Supplement: 41396_2021_917_MOESM2_ESM.pdf [file 41396_2021_917_MOESM2_ESM.pdf]

Table S1. Amberjack hole water column sample metadata and amplicon sequencing results. Processed reads are those that were quality-filtered, trimmed, and run through DADA2.

| <b>Sample ID</b> | <b>Month</b> | <b>Depth (m)</b> | <b>Sampling method</b> | <b># Raw reads</b> | <b># processed reads</b> |
|------------------|--------------|------------------|------------------------|--------------------|--------------------------|
| BH050M           | May          | 0                | Niskin (hand-cast)     | 83,548             | 30,537                   |
| BH057M           | May          | 7                | Niskin (rosette)       | 84,483             | 40,768                   |
| BH0515MA         | May          | 15               | Niskin (rosette)       | 102,362            | 44,445                   |
| BH0515MB         | May          | 15               | Diver bottle           | 50,951             | 12,692                   |
| BH0523M          | May          | 23               | Niskin (rosette)       | 88,320             | 49,639                   |
| BH0530M          | May          | 30               | Niskin (hand-cast)     | 94,299             | 47,610                   |
| BH0532C          | May          | 32               | Diver bottle           | 79,530             | 39,941                   |
| BH0546M          | May          | 46               | Diver bottle           | 109,288            | 55,089                   |
| BH0560M          | May          | 60               | Niskin (hand-cast)     | 111,130            | 62,497                   |
| BH0561M          | May          | 61               | Diver bottle           | 75,200             | 33,385                   |
| BH0585M          | May          | 85               | Niskin (hand-cast)     | 116,106            | 59,356                   |
| BH05106M         | May          | 106              | Diver bottle           | 93,844             | 48,642                   |
| BH0910M          | September    | 10               | Niskin (hand-cast)     | 146,001            | 83,136                   |
| BH0920M          | September    | 20               | Niskin (hand-cast)     | 133,862            | 80,147                   |
| BH0930M          | September    | 30               | Niskin (hand-cast)     | 162,528            | 86,957                   |
| BH0940M          | September    | 40               | Niskin (hand-cast)     | 170,522            | 89,819                   |
| BH0950M          | September    | 50               | Niskin (hand-cast)     | 194,395            | 118,397                  |
| BH0960M          | September    | 60               | Niskin (hand-cast)     | 172,560            | 97,492                   |
| BH0970M          | September    | 70               | Niskin (hand-cast)     | 141,769            | 84,787                   |
| BH0980M          | September    | 80               | Niskin (hand-cast)     | 190,289            | 106,121                  |
| BH0985M          | September    | 85               | Niskin (hand-cast)     | 173,136            | 95,596                   |
| BH0990M          | September    | 90               | Niskin (hand-cast)     | 128,982            | 67,244                   |
| BH0995M          | September    | 95               | Niskin (hand-cast)     | 172,152            | 102,331                  |
