# Supplementary material
Source: PubMed Central journal article supplement (PMC8319197)
Supplement: 41396_2021_917_MOESM3_ESM.pdf [file 41396_2021_917_MOESM3_ESM.pdf]

Table S2. Metagenome read and assembly data including sample source, pre- and post-quality filtered reads, genome equivalent and average size values, and assembly statistics for both single and co-assemblies.

| Sample ID | Month     | Depth (m) | # Raw Reads | # Filtered Reads | Kraken2                          | MicrobeCensus (reads pre-assembly) |                                    | SPAdes Assembly  |       |                     | Co-assembly      |        |                     |
|-----------|-----------|-----------|-------------|------------------|----------------------------------|------------------------------------|------------------------------------|------------------|-------|---------------------|------------------|--------|---------------------|
|           |           |           |             |                  | % reads taxonomically classified | Estimated genome equivalents       | Estimated average genome size (bp) | # contigs > 1Kbp | N50   | longest contig (bp) | # contigs > 1Kbp | N50    | longest contig (bp) |
| BH0560M   | May       | 60        | 3,240,148   | 2,202,966        | 17                               | 663.76                             | 2,511,984                          | 9,869            | 2,247 | 405,204             | 10,696           | 12,222 | 625,129             |
| BH05106M  | May       | 106       | 3,729,927   | 1,483,928        | 11                               | 402.55                             | 3,340,433                          | 7,425            | 1,733 | 108,892             | 11,167           | 12,834 | 453,391             |
| BH0960M   | September | 60        | 13,150,727  | 13,134,788       | 18                               | 2,395.80                           | 2,476,305                          | 31,896           | 3,527 | 421,576             | 10,696           | 12,222 | 625,129             |
| BH0995M   | September | 95        | 11,894,511  | 9,488,634        | 9                                | 1,265.38                           | 4,453,747                          | 40,713           | 2,673 | 598,144             | 11,167           | 12,834 | 453,391             |
