# Supplementary material
Source: PubMed Central journal article supplement (PMC8319197)
Supplement: 41396_2021_917_MOESM4_ESM.pdf [file 41396_2021_917_MOESM4_ESM.pdf]

Table S3. Metagenome-assembled genomes (MAGs) and their associated samples, quality metrics, and assigned taxonomy.

| MAG ID | Depth (m) | anvi'o quality metrics |            | CheckM quality metrics |               | Genome Taxonomy (GTDB)                                                                                                   |
|--------|-----------|------------------------|------------|------------------------|---------------|--------------------------------------------------------------------------------------------------------------------------|
|        |           | Completeness           | Redundancy | Completeness           | Contamination |                                                                                                                          |
| BH1    | 60        | 94.51                  | 0          | 95.77                  | 0             | d__Bacteria;p__Marinisomatota;c__Marinisomatia;o__Marinisomatales;f__TCS55;g__TCS55;s__                                  |
| BH2    | 60        | 77.22                  | 0.42       | 87.32                  | 8.45          | d__Bacteria;p__Proteobacteria;c__Gammaproteobacteria;o__Pseudomonadales;f__Porticocaceae;g__HTCC2207;s__                 |
| BH3    | 60        | 82.4                   | 4.24       | 86.84                  | 5.26          | d__Archaea;p__Thermoplasmatota;c__Poseidonii;a__MGIII;f__CG-Epi1;g__CG-Epi1;s__                                          |
| BH4    | 60        | 72.93                  | 0.8        | 90.79                  | 2.63          | d__Archaea;p__Thermoplasmatota;c__Poseidonii;a__Poseidoniales;f__Thalassoarchaeaceae;g__MGIIb-O2;s__MGIIb-O2 sp002686525 |
| BH5    | 60        | 98.25                  | 7.18       | 100                    | 15.49         | d__Bacteria;p__Proteobacteria;c__Gammaproteobacteria;o__Burkholderiales;f__Nitrosomonadaceae;g__GCA-2721545;s__          |
| BH6    | 60        | 45.99                  | 0          | 0                      | 0             | d__Bacteria;p__Proteobacteria;c__Alphaproteobacteria;o__Puniceispirillales;f__Puniceispirillaceae;g__s__                 |
| BH7    | 60        | 97.44                  | 8.12       | 92.96                  | 5.63          | d__Bacteria;p__Actinobacteriota;c__Acidimicrobia;o__Microtrichales;f__TK06;g__UBA6944;s__UBA6944 sp002296525             |
| BH8    | 60        | 96.58                  | 5.79       | 100                    | 23.94         | d__Bacteria;p__Actinobacteriota;c__Acidimicrobia;o__Microtrichales;f__UBA11606;g__UBA11606;s__                           |
| BH9    | 60        | 96.55                  | 9.91       | 97.18                  | 23.94         | d__Bacteria;p__Proteobacteria;c__Gammaproteobacteria;o__Methylococcales;f__Methylomonadaceae;g__OPU3-GD-OMZ;s__          |
| BH10   | 60        | 84.76                  | 5.08       | 90.14                  | 7.04          | d__Bacteria;p__Proteobacteria;c__Gammaproteobacteria;o__UBA10353;f__LS-SOB;g__UBA5682;s__                                |
| BH11   | 60        | 80.4                   | 7.14       | 90.79                  | 2.63          | d__Archaea;p__Thermoplasmatota;c__Poseidonii;a__Poseidoniales;f__Thalassoarchaeaceae;g__MGIIb-O1;s__MGIIb-O1 sp002496905 |
| BH12   | 60        | 72.22                  | 3.2        | 64.47                  | 5.26          | d__Archaea;p__Thermoplasmatota;c__Poseidonii;a__Poseidoniales;f__Thalassoarchaeaceae;g__MGIIb-O1;s__MGIIb-O1 sp002502365 |
| BH13   | 60        | 86                     | 1.6        | 93.42                  | 1.32          | d__Archaea;p__Thermoplasmatota;c__Poseidonii;a__Poseidoniales;f__Thalassoarchaeaceae;g__MGIIb-O1;s__                     |
| BH14   | 60        | 89.68                  | 4.47       | 98.59                  | 18.31         | d__Bacteria;p__Proteobacteria;c__Gammaproteobacteria;o__Pseudomonadales;f__Nitrincolaceae;g__ASP10-02a;s__               |
| BH15   | 60        | 82.36                  | 0          | 96.05                  | 1.32          | d__Archaea;p__Thermoplasmatota;c__Poseidonii;a__Poseidoniales;f__Thalassoarchaeaceae;g__s__                              |
| BH16   | 60        | 95.73                  | 2.14       | 97.18                  | 0             | d__Bacteria;p__Actinobacteriota;c__Acidimicrobia;o__Microtrichales;f__MedAcidi-G1;g__UBA9410;s__                         |
| BH17   | 60        | 73.42                  | 2.58       | 67.61                  | 4.23          | d__Bacteria;p__Myxococota;c__UBA796;o__UBA796;f__UBA796;g__s__                                                           |
| BH18   | 60        | 97.66                  | 0.57       | 92.96                  | 0             | d__Bacteria;p__Planctomycetota;c__Phycisphaerae;o__Phycisphaerales;f__SM1A02;g__GCA-002718515;s__                        |
| BH19   | 60        | 53.12                  | 6.45       | 63.16                  | 5.26          | d__Archaea;p__Crenarchaeota;c__Nitrososphaeria;o__Nitrososphaerales;f__Nitrosopumilaceae;g__Nitrosopumilus;s__           |
| BH20   | 95-106    | 92.14                  | 1.66       | 100                    | 2.82          | d__Bacteria;p__Proteobacteria;c__Gammaproteobacteria;o__Thiomicrospirales;f__Thioglobaceae;g__UBA2013;s__                |
| BH21   | 95-106    | 73.36                  | 0          | 67.11                  | 1.32          | d__Archaea;p__Nanoarchaeota;c__Nanoarchaea;o__SCGC-AAA011-G17;f__UBA489;g__s__                                           |
| BH22   | 95-106    | 83.1                   | 1.41       | 83.1                   | 1.41          | d__Bacteria;p__Patescibacteria;c__ABY1;o__SG8-24;f__UBA11717;g__UBA11717;s__sp002774875                                  |
| BH23   | 95-106    | 94.57                  | 0.54       | 91.55                  | 1.41          | d__Bacteria;p__Bacteroidota;c__Bacteroidia;o__Bacteroidales;f__F082;g__s__                                               |
| BH24   | 95-106    | 98.51                  | 5.02       | 100                    | 1.41          | d__Bacteria;p__Proteobacteria;c__Alphaproteobacteria;o__Rhodospirillales_A;f__UBA3470;g__TMED8;s__                       |
| BH25   | 95-106    | 96.77                  | 1.61       | 98.59                  | 2.82          | d__Bacteria;p__Bacteroidota;c__Bacteroidia;o__Bacteroidales;f__F082;g__GCA-002708315;s__                                 |
| BH26   | 95-106    | 96.7                   | 1.1        | 95.77                  | 1.41          | d__Bacteria;p__Marinisomatota;c__UBA8477;o__UBA8477;f__UBA8477;g__s__                                                    |
| BH27   | 95-106    | 92.24                  | 1.9        | 77.46                  | 2.82          | d__Bacteria;p__Marinisomatota;c__UBA8477;o__UBA8477;f__UBA8477;g__s__                                                    |
| BH28   | 95-106    | 74.26                  | 0.99       | 88.73                  | 0             | d__Bacteria;p__Patescibacteria;c__ABY1;o__SG8-24;f__GWF2-40-263;g__UM-FILTER-50-9;s__                                    |
| BH29   | 95-106    | 95.1                   | 3.86       | 87.32                  | 9.86          | d__Bacteria;p__Marinisomatota;c__UBA8477;o__UBA8477;f__UBA8477;g__s__                                                    |
| BH30   | 95-106    | 97.1                   | 7.31       | 98.59                  | 8.45          | d__Bacteria;p__Desulfobacterota;c__Desulfobacteria;o__Desulfatiglandales;f__NaphS2;g__NaphS2;s__                         |
| BH31   | 95        | 53.15                  | 1.4        | 81.69                  | 5.63          | d__Bacteria;p__Myxococota;c__UBA796;o__UBA796;f__s__g__s__                                                               |

16S rRNA gene SV taxonomy (SILVA)

Marinimicrobia (SAR406 clade); D\_2\_\_uncultured bacterium HF0500\_01L02; D\_3\_\_uncultured bacterium HF0500\_01L02; D\_4\_\_uncultured bacterium HF0500\_01L02; D\_5\_\_uncultured bacterium HF0500\_01L02; D\_6\_\_uncultured bacterium HF0500\_01L02  
Proteobacteria; D\_2\_\_Gammaproteobacteria; D\_3\_\_Cellvibrionales; D\_4\_\_Porticococaceae; D\_5\_\_SAR92 clade

Euryarchaeota; D\_2\_\_Thermoplasmata; D\_3\_\_Marine Group II; D\_4\_\_uncultured marine archaeon DCM3921; D\_5\_\_uncultured marine archaeon DCM3921; D\_6\_\_uncultured marine archaeon DCM3921  
Proteobacteria; D\_2\_\_Gammaproteobacteria; D\_3\_\_Betaproteobacteriales; D\_4\_\_Nitrosomonadaceae; D\_5\_\_Nitrosomonas; D\_6\_\_marine metagenome

Proteobacteria; D\_2\_\_Gammaproteobacteria; D\_3\_\_SAR86 clade

Euryarchaeota; D\_2\_\_Thermoplasmata; D\_3\_\_Marine Group II; D\_4\_\_uncultured marine group II/III euryarchaeote KM3\_53\_G07; D\_5\_\_uncultured marine group II/III euryarchaeote KM3\_53\_G07; D\_6\_\_uncultured marine group II/III euryarchaeote KM3\_53\_G07

Planctomycetes; D\_2\_\_Phycisphaerae; D\_3\_\_Phycisphaerales; D\_4\_\_Phycisphaeraceae; D\_5\_\_JL-ETNP-F27

Thaumarchaeota; D\_2\_\_Nitrososphaeria; D\_3\_\_Nitrosopumilales; D\_4\_\_Nitrosopumilaceae; D\_5\_\_Candidatus Nitrosopumilus

Proteobacteria; D\_2\_\_Gammaproteobacteria; D\_3\_\_Thiomicrospirales; D\_4\_\_Thioglobaceae; D\_5\_\_SUP05 cluster; D\_6\_\_uncultured gamma proteobacterium

Nanoarchaeaeota; D\_2\_\_Woesearchaeia

(1) Patescibacteria; D\_2\_\_ABY1; D\_3\_\_Candidatus Uhrbacteria; (2) D\_0\_\_Bacteria; D\_1\_\_Planctomycetes; D\_2\_\_Phycisphaerae

Proteobacteria; D\_2\_\_Alphaproteobacteria; D\_3\_\_Rhodospirillales; D\_4\_\_Magnetospiraceae; D\_5\_\_uncultured; D\_6\_\_uncultured alpha proteobacterium

Bacteroidetes; D\_2\_\_Bacteroidia; D\_3\_\_Bacteroidetes VC2.1 Bac22; D\_4\_\_uncultured alpha proteobacterium; D\_5\_\_uncultured alpha proteobacterium; D\_6\_\_uncultured alpha proteobacterium
