# Supplementary material
Source: PubMed Central journal article supplement (PMC8319197)
Supplement: 41396_2021_917_MOESM6_ESM.pdf [file 41396_2021_917_MOESM6_ESM.pdf]

Table S5. All annotated genes located on the longest contig containing K23573, the hypothetical protein with the largest difference in relative abundance between the 60 M and deep samples.

| Gene              | KO     | Group                                | Subgroup1                                      | Subgroup2                                   | Function                                                                                                 |
|-------------------|--------|--------------------------------------|------------------------------------------------|---------------------------------------------|----------------------------------------------------------------------------------------------------------|
| c_00000009473_13  | K07461 | Not Included in Pathway or Brite     | Unclassified: genetic information processing   | Replication and repair                      | K07461; putative endonuclease                                                                            |
| c_00000009473_14  | K13993 | Genetic Information Processing       | Folding, sorting and degradation               | Protein processing in endoplasmic reticulum | HSP20; HSP20 family protein                                                                              |
| c_00000009473_23  | K11927 | Genetic Information Processing       | Folding, sorting and degradation               | RNA degradation                             | rHE; ATP-dependent RNA helicase RHE [EC:3.6.4.13]                                                        |
| c_00000009473_24  | K00254 | Metabolism                           | Nucleotide metabolism                          | Pyrimidine metabolism                       | DHODH; pyrD; dihydroorotate dehydrogenase [EC:1.3.5.2]                                                   |
| c_00000009473_37  | K00794 | Metabolism                           | Metabolism of cofactors and vitamins           | Riboflavin metabolism                       | riH, RIB4; 6,7-dimethyl-8-ribityllumazine synthase [EC:2.5.1.78]                                         |
| c_00000009473_38  | K03564 | Not Included in Pathway or Brite     | Unclassified: metabolism                       | Enzymes with EC numbers                     | BCP, PRXQ, DOT5; peroxidoxin Q/BCP [EC:1.11.1.15]                                                        |
| c_00000009473_47  | K05307 | Metabolism                           | Metabolism of cofactors and vitamins           | Thiamine metabolism                         | THTPA; thiamine-triphosphatase [EC:3.6.1.28]                                                             |
| c_00000009473_48  | K00574 | Not Included in Pathway or Brite     | Unclassified: metabolism                       | Enzymes with EC numbers                     | cfa; cyclopropane-fatty-acyl-phospholipid synthase [EC:2.1.1.79]                                         |
| c_00000009473_59  | K01255 | Metabolism                           | Metabolism of other amino acids                | Glutathione metabolism                      | CARP; pepA; leucyl aminopeptidase [EC:3.4.11.1]                                                          |
| c_00000009473_60  | K03386 | Cellular Processes                   | Cell growth and death                          | Apoptosis - fly                             | PRDX2_4, ahpC; peroxidoxin (alkyl hydroperoxide reductase subunit C) [EC:1.11.1.15]                      |
| c_00000009473_63  | K01874 | Metabolism                           | Metabolism of other amino acids                | Selenocompound metabolism                   | MARS; metG; methionyl-tRNA synthetase [EC:6.1.1.10]                                                      |
| c_00000009473_63  | K01874 | Genetic Information Processing       | Translation                                    | Aminoacyl-tRNA biosynthesis                 | MARS; metG; methionyl-tRNA synthetase [EC:6.1.1.10]                                                      |
| c_00000009473_64  | K03558 | Not Included in Pathway or Brite     | Poorly characterized                           | General function prediction only            | cvpA; membrane protein required for colicin V production                                                 |
| c_00000009473_65  | K03424 | Not Included in Pathway or Brite     | Unclassified: metabolism                       | Enzymes with EC numbers                     | tatD; TatD NDNase family protein [EC:3.1.21.-]                                                           |
| c_00000009473_67  | K02108 | Metabolism                           | Energy metabolism                              | Oxidative phosphorylation                   | ATPF0A; atpB; F-type H <sup>+</sup> -transporting ATPase subunit a                                       |
| c_00000009473_67  | K02108 | Metabolism                           | Energy metabolism                              | Photosynthesis                              | ATPF0A; atpB; F-type H <sup>+</sup> -transporting ATPase subunit a                                       |
| c_00000009473_68  | K02110 | Metabolism                           | Energy metabolism                              | Oxidative phosphorylation                   | ATPF0C; atpE; F-type H <sup>+</sup> -transporting ATPase subunit c                                       |
| c_00000009473_68  | K02110 | Metabolism                           | Energy metabolism                              | Photosynthesis                              | ATPF0C; atpE; F-type H <sup>+</sup> -transporting ATPase subunit c                                       |
| c_00000009473_69  | K02109 | Metabolism                           | Energy metabolism                              | Oxidative phosphorylation                   | ATPF0B; atpF; F-type H <sup>+</sup> -transporting ATPase subunit b                                       |
| c_00000009473_69  | K02109 | Metabolism                           | Energy metabolism                              | Photosynthesis                              | ATPF0B; atpF; F-type H <sup>+</sup> -transporting ATPase subunit b                                       |
| c_00000009473_71  | K02111 | Metabolism                           | Energy metabolism                              | Oxidative phosphorylation                   | ATPF1A; atpA; F-type H <sup>+</sup> /Na <sup>+</sup> -transporting ATPase subunit alpha [EC:7.1.2.2.2.1] |
| c_00000009473_71  | K02111 | Metabolism                           | Energy metabolism                              | Photosynthesis                              | ATPF1A; atpA; F-type H <sup>+</sup> /Na <sup>+</sup> -transporting ATPase subunit alpha [EC:7.1.2.2.2.1] |
| c_00000009473_73  | K02112 | Metabolism                           | Energy metabolism                              | Oxidative phosphorylation                   | ATPF1B; atpD; F-type H <sup>+</sup> /Na <sup>+</sup> -transporting ATPase subunit beta [EC:7.1.2.2.2.1]  |
| c_00000009473_73  | K02112 | Metabolism                           | Energy metabolism                              | Photosynthesis                              | ATPF1B; atpD; F-type H <sup>+</sup> /Na <sup>+</sup> -transporting ATPase subunit beta [EC:7.1.2.2.2.1]  |
| c_00000009473_76  | K04566 | Genetic Information Processing       | Translation                                    | Aminoacyl-tRNA biosynthesis                 | lysK; lysyl-tRNA synthetase, class I [EC:6.1.1.6]                                                        |
| c_00000009473_79  | K21929 | Genetic Information Processing       | Replication and repair                         | Base excision repair                        | udg; uracil-DNA glycosylase [EC:3.2.2.27]                                                                |
| c_00000009473_80  | K00857 | Metabolism                           | Nucleotide metabolism                          | Pyrimidine metabolism                       | tdk, TK; thymidine kinase [EC:2.7.1.21]                                                                  |
| c_00000009473_80  | K00857 | Metabolism                           | Xenobiotics biodegradation and metabolism      | Drug metabolism - other enzymes             | tdk, TK; thymidine kinase [EC:2.7.1.21]                                                                  |
| c_00000009473_82  | K07043 | Not Included in Pathway or Brite     | Poorly characterized                           | Function unknown                            | K07043; uncharacterized protein                                                                          |
| c_00000009473_83  | K03657 | Genetic Information Processing       | Replication and repair                         | Nucleotide excision repair                  | uvrD, pcrA; DNA helicase II / ATP-dependent DNA helicase PcrA [EC:3.6.4.12]                              |
| c_00000009473_83  | K03657 | Genetic Information Processing       | Replication and repair                         | Mismatch repair                             | uvrD, pcrA; DNA helicase II / ATP-dependent DNA helicase PcrA [EC:3.6.4.12]                              |
| c_00000009473_89  | K05515 | Metabolism                           | Glycan biosynthesis and metabolism             | Peptidoglycan biosynthesis                  | mrda; penicillin-binding protein 2 [EC:3.4.16.4]                                                         |
| c_00000009473_92  | K01875 | Genetic Information Processing       | Translation                                    | Aminoacyl-tRNA biosynthesis                 | SARS; serS; seryl-tRNA synthetase [EC:6.1.1.11]                                                          |
| c_00000009473_93  | K03589 | Cellular Processes                   | Cell growth and death                          | Cell cycle - Caulobacter                    | ftsQ; cell division protein FtsQ                                                                         |
| c_00000009473_95  | K09779 | Not Included in Pathway or Brite     | Poorly characterized                           | Function unknown                            | K09779; uncharacterized protein                                                                          |
| c_00000009473_97  | K01885 | Metabolism                           | Metabolism of cofactors and vitamins           | Porphyrin and chlorophyll metabolism        | EARS; gtx; glutamyl-tRNA synthetase [EC:6.1.1.17]                                                        |
| c_00000009473_97  | K01885 | Genetic Information Processing       | Translation                                    | Aminoacyl-tRNA biosynthesis                 | EARS; gtx; glutamyl-tRNA synthetase [EC:6.1.1.17]                                                        |
| c_00000009473_106 | K01462 | Not Included in Pathway or Brite     | Unclassified: metabolism                       | Enzymes with EC numbers                     | PDF; def; peptide deformylase [EC:3.5.1.88]                                                              |
| c_00000009473_107 | K00604 | Metabolism                           | Metabolism of cofactors and vitamins           | One carbon pool by folate                   | MTFM; fnt; methionyl-tRNA formyltransferase [EC:2.1.2.9]                                                 |
| c_00000009473_107 | K00604 | Genetic Information Processing       | Translation                                    | Aminoacyl-tRNA biosynthesis                 | MTFM; fnt; methionyl-tRNA formyltransferase [EC:2.1.2.9]                                                 |
| c_00000009473_116 | K03328 | Not Included in Pathway or Brite     | Unclassified: signaling and cellular processes | Transport                                   | TC.PST; polysaccharide transporter, PST family                                                           |
| c_00000009473_117 | K02996 | Genetic Information Processing       | Translation                                    | Ribosome                                    | RP-S9, MRPS9, rpsI; small subunit ribosomal protein S9                                                   |
| c_00000009473_118 | K02871 | Genetic Information Processing       | Translation                                    | Ribosome                                    | RP-L13, MRPL13, rplM; large subunit ribosomal protein L13                                                |
| c_00000009473_119 | K02879 | Genetic Information Processing       | Translation                                    | Ribosome                                    | RP-L17, MRPL17, rplQ; large subunit ribosomal protein L17                                                |
| c_00000009473_120 | K03040 | Genetic Information Processing       | Transcription                                  | RNA polymerase                              | rpoA; DNA-directed RNA polymerase subunit alpha [EC:2.7.7.6]                                             |
| c_00000009473_121 | K02986 | Genetic Information Processing       | Translation                                    | Ribosome                                    | RP-S4, rpsD; small subunit ribosomal protein S4                                                          |
| c_00000009473_122 | K02948 | Genetic Information Processing       | Translation                                    | Ribosome                                    | RP-S11, MRPS11, rpsK; small subunit ribosomal protein S11                                                |
| c_00000009473_123 | K02952 | Genetic Information Processing       | Translation                                    | Ribosome                                    | RP-S13, rpsM; small subunit ribosomal protein S13                                                        |
| c_00000009473_125 | K01872 | Genetic Information Processing       | Translation                                    | Aminoacyl-tRNA biosynthesis                 | AARS; alaS; alanyl-tRNA synthetase [EC:6.1.1.7]                                                          |
| c_00000009473_136 | K07576 | Not Included in Pathway or Brite     | Unclassified: genetic information processing   | Translation                                 | K07576; metallo-beta-lactamase family protein                                                            |
| c_00000009473_143 | K02343 | Genetic Information Processing       | Replication and repair                         | DNA replication                             | dnaX; DNA polymerase III subunit gamma/tau [EC:2.7.7.7]                                                  |
| c_00000009473_143 | K02343 | Genetic Information Processing       | Replication and repair                         | Mismatch repair                             | dnaX; DNA polymerase III subunit gamma/tau [EC:2.7.7.7]                                                  |
| c_00000009473_143 | K02343 | Genetic Information Processing       | Replication and repair                         | Homologous recombination                    | dnaX; DNA polymerase III subunit gamma/tau [EC:2.7.7.7]                                                  |
| c_00000009473_151 | K01883 | Genetic Information Processing       | Translation                                    | Aminoacyl-tRNA biosynthesis                 | CARS; cysS; cysteinyl-tRNA synthetase [EC:6.1.1.16]                                                      |
| c_00000009473_161 | K04043 | Genetic Information Processing       | Folding, sorting and degradation               | RNA degradation                             | dnaK; HSPA9; molecular chaperone DnaK                                                                    |
| c_00000009473_168 | K03455 | Not Included in Pathway or Brite     | Unclassified: signaling and cellular processes | Transport                                   | TC.KEF; monovalent cation:H <sup>+</sup> antiporter-2, CPA2 family                                       |
| c_00000009473_170 | K01929 | Metabolism                           | Amino acid metabolism                          | Lysine biosynthesis                         | murF; UDP-N-acetylmuramoyl-tripeptide-D-alanyl-D-alanine ligase [EC:6.3.2.10]                            |
| c_00000009473_170 | K01929 | Metabolism                           | Glycan biosynthesis and metabolism             | Peptidoglycan biosynthesis                  | murF; UDP-N-acetylmuramoyl-tripeptide-D-alanyl-D-alanine ligase [EC:6.3.2.10]                            |
| c_00000009473_171 | K03587 | Metabolism                           | Glycan biosynthesis and metabolism             | Peptidoglycan biosynthesis                  | ftsI; cell division protein FtsI (penicillin-binding protein 3) [EC:3.4.16.4]                            |
| c_00000009473_175 | K19221 | Metabolism                           | Metabolism of cofactors and vitamins           | Porphyrin and chlorophyll metabolism        | cobA, btuR; cob(I)alamin adenosyltransferase [EC:2.5.1.17]                                               |
| c_00000009473_178 | K00525 | Metabolism                           | Nucleotide metabolism                          | Purine metabolism                           | E1.17.4.1A, nrdA, nrdE; ribonucleoside-diphosphate reductase alpha chain [EC:1.17.4.1]                   |
| c_00000009473_178 | K00525 | Metabolism                           | Nucleotide metabolism                          | Pyrimidine metabolism                       | E1.17.4.1A, nrdA, nrdE; ribonucleoside-diphosphate reductase alpha chain [EC:1.17.4.1]                   |
| c_00000009473_183 | K00382 | Metabolism                           | Carbohydrate metabolism                        | Glycolysis / Gluconeogenesis                | DLD, lpd, pdhD; dihydroloamide dehydrogenase [EC:1.8.1.4]                                                |
| c_00000009473_183 | K00382 | Metabolism                           | Carbohydrate metabolism                        | Citrate cycle (TCA cycle)                   | DLD, lpd, pdhD; dihydroloamide dehydrogenase [EC:1.8.1.4]                                                |
| c_00000009473_183 | K00382 | Metabolism                           | Carbohydrate metabolism                        | Pyruvate metabolism                         | DLD, lpd, pdhD; dihydroloamide dehydrogenase [EC:1.8.1.4]                                                |
| c_00000009473_183 | K00382 | Metabolism                           | Carbohydrate metabolism                        | Glyoxylate and dicarboxylate metabolism     | DLD, lpd, pdhD; dihydroloamide dehydrogenase [EC:1.8.1.4]                                                |
| c_00000009473_183 | K00382 | Metabolism                           | Carbohydrate metabolism                        | Propanoate metabolism                       | DLD, lpd, pdhD; dihydroloamide dehydrogenase [EC:1.8.1.4]                                                |
| c_00000009473_183 | K00382 | Metabolism                           | Amino acid metabolism                          | Glycine, serine and threonine metabolism    | DLD, lpd, pdhD; dihydroloamide dehydrogenase [EC:1.8.1.4]                                                |
| c_00000009473_183 | K00382 | Metabolism                           | Amino acid metabolism                          | Valine, leucine and isoleucine degradation  | DLD, lpd, pdhD; dihydroloamide dehydrogenase [EC:1.8.1.4]                                                |
| c_00000009473_183 | K00382 | Metabolism                           | Amino acid metabolism                          | Lysine degradation                          | DLD, lpd, pdhD; dihydroloamide dehydrogenase [EC:1.8.1.4]                                                |
| c_00000009473_183 | K00382 | Metabolism                           | Amino acid metabolism                          | Tryptophan metabolism                       | DLD, lpd, pdhD; dihydroloamide dehydrogenase [EC:1.8.1.4]                                                |
| c_00000009473_194 | K23170 | Metabolism                           | Metabolism of other amino acids                | D-Glutamine and D-glutamate metabolism      | murL; UDP-N-acetyl-alpha-D-muramoyl-L-alanyl-L-glutamate epimerase [EC:5.1.1.23]                         |
| c_00000009473_205 | K05770 | Environmental Information Processing | Signaling molecules and interaction            | Neuroactive ligand-receptor interaction     | TSP0, BZRP; translocator protein                                                                         |
| c_00000009473_205 | K05770 | Cellular Processes                   | Cell growth and death                          | Apoptosis - fly                             | TSP0, BZRP; translocator protein                                                                         |
| c_00000009473_213 | K00134 | Metabolism                           | Carbohydrate metabolism                        | Glycolysis / Gluconeogenesis                | GAPDH, gapA; glyceraldehyde 3-phosphate dehydrogenase [EC:1.2.1.12]                                      |
| c_00000009473_213 | K00134 | Metabolism                           | Energy metabolism                              | Carbon fixation in photosynthetic organisms | GAPDH, gapA; glyceraldehyde 3-phosphate dehydrogenase [EC:1.2.1.12]                                      |
| c_00000009473_213 | K00134 | Environmental Information Processing | Signal transduction                            | HIF-1 signaling pathway                     | GAPDH, gapA; glyceraldehyde 3-phosphate dehydrogenase [EC:1.2.1.12]                                      |
| c_00000009473_214 | K03455 | Not Included in Pathway or Brite     | Unclassified: signaling and cellular processes | Transport                                   | TC.KEF; monovalent cation:H <sup>+</sup> antiporter-2, CPA2 family                                       |
| c_00000009473_230 | K00793 | Metabolism                           | Metabolism of cofactors and vitamins           | Riboflavin metabolism                       | ribE, RIB5; riboflavin synthase [EC:2.5.1.9]                                                             |
| c_00000009473_237 | K01921 | Metabolism                           | Metabolism of other amino acids                | D-Alanine metabolism                        | ddi; D-alanine-D-alanine ligase [EC:3.6.2.4]                                                             |
| c_00000009473_237 | K01921 | Metabolism                           | Glycan biosynthesis and metabolism             | Peptidoglycan biosynthesis                  | ddi; D-alanine-D-alanine ligase [EC:3.6.2.4]                                                             |
| c_00000009473_238 | K17686 | Environmental Information Processing | Signal transduction                            | MAPK signaling pathway - plant              | copA, ctpA, ATP7; P-type Cu <sup>+</sup> transporter [EC:7.2.2.8]                                        |
| c_00000009473_238 | K01533 | Not Included in Pathway or Brite     | Unclassified: metabolism                       | Enzymes with EC numbers                     | copB; P-type Cu <sup>2+</sup> transporter [EC:7.2.2.9]                                                   |
| c_00000009473_239 | K09792 | Not Included in Pathway or Brite     | Poorly characterized                           | Function unknown                            | K09792; uncharacterized protein                                                                          |
| c_00000009473_243 | K01803 | Metabolism                           | Carbohydrate metabolism                        | Glycolysis / Gluconeogenesis                | TPI, tpiA; triosephosphate isomerase (TIM) [EC:5.3.1.1]                                                  |
| c_00000009473_243 | K01803 | Metabolism                           | Carbohydrate metabolism                        | Fructose and mannose metabolism             | TPI, tpiA; triosephosphate isomerase (TIM) [EC:5.3.1.1]                                                  |
| c_00000009473_243 | K01803 | Metabolism                           | Carbohydrate metabolism                        | Inositol phosphate metabolism               | TPI, tpiA; triosephosphate isomerase (TIM) [EC:5.3.1.1]                                                  |
| c_00000009473_243 | K01803 | Metabolism                           | Energy metabolism                              | Carbon fixation in photosynthetic organisms | TPI, tpiA; triosephosphate isomerase (TIM) [EC:5.3.1.1]                                                  |
| c_00000009473_245 | K01880 | Genetic Information Processing       | Translation                                    | Aminoacyl-tRNA biosynthesis                 | GARS; glyS1; glycyl-tRNA synthetase [EC:6.1.1.14]                                                        |
| c_00000009473_267 | K02864 | Genetic Information Processing       | Translation                                    | Ribosome                                    | RP-L10, MRPL10, rplJ; large subunit ribosomal protein L10                                                |
| c_00000009473_268 | K02935 | Genetic Information Processing       | Translation                                    | Ribosome                                    | RP-L7, MRPL7, rplL; large subunit ribosomal protein L7/L12                                               |
| c_00000009473_271 | K09903 | Metabolism                           | Nucleotide metabolism                          | Pyrimidine metabolism                       | pyrH; uridylyl kinase [EC:2.7.4.22]                                                                      |
| c_00000009473_272 | K08972 | Not Included in Pathway or Brite     | Poorly characterized                           | General function prediction only            | K08972; putative membrane protein                                                                        |
| c_00000009473_273 | K03602 | Genetic Information Processing       | Replication and repair                         | Mismatch repair                             | xseB; exodeoxyribonuclease VII small subunit [EC:3.1.11.6]                                               |
| c_00000009473_274 | K03601 | Genetic Information Processing       | Replication and repair                         | Mismatch repair                             | xseA; exodeoxyribonuclease VII large subunit [EC:3.1.11.6]                                               |
| c_00000009473_287 | K00116 | Metabolism                           | Carbohydrate metabolism                        | Citrate cycle (TCA cycle)                   | mqo; malate dehydrogenase (quinone) [EC:1.1.5.4]                                                         |
| c_00000009473_287 | K00116 | Metabolism                           | Carbohydrate metabolism                        | Pyruvate metabolism                         | mqo; malate dehydrogenase (quinone) [EC:1.1.5.4]                                                         |
| c_00000009473_291 | K00789 | Metabolism                           | Amino acid metabolism                          | Cysteine and methionine metabolism          | metK; S-adenosylmethionine synthetase [EC:2.5.1.6]                                                       |

|                   |        |                                      |                                              |                                             |                                                                                                    |
|-------------------|--------|--------------------------------------|----------------------------------------------|---------------------------------------------|----------------------------------------------------------------------------------------------------|
| c_00000009473_299 | K03657 | Genetic Information Processing       | Replication and repair                       | Nucleotide excision repair                  | uvrD, pcrA; DNA helicase II / ATP-dependent DNA helicase PcrA [EC:3.6.4.12]                        |
| c_00000009473_299 | K03657 | Genetic Information Processing       | Replication and repair                       | Mismatch repair                             | uvrD, pcrA; DNA helicase II / ATP-dependent DNA helicase PcrA [EC:3.6.4.12]                        |
| c_00000009473_301 | K07082 | Not Included in Pathway or Brite     | Poorly characterized                         | General function prediction only            | K07082; UPF0755 protein                                                                            |
| c_00000009473_302 | K00971 | Metabolism                           | Carbohydrate metabolism                      | Fructose and mannose metabolism             | manC, cpsB; mannose-1-phosphate guanylyltransferase [EC:2.7.7.13]                                  |
| c_00000009473_302 | K00971 | Metabolism                           | Carbohydrate metabolism                      | Amino sugar and nucleotide sugar metabolism | manC, cpsB; mannose-1-phosphate guanylyltransferase [EC:2.7.7.13]                                  |
| c_00000009473_304 | K15633 | Metabolism                           | Carbohydrate metabolism                      | Glycolysis / Gluconeogenesis                | gpmI; 2,3-bisphosphoglycerate-independent phosphoglycerate mutase [EC:5.4.2.12]                    |
| c_00000009473_304 | K15633 | Metabolism                           | Energy metabolism                            | Methane metabolism                          | gpmI; 2,3-bisphosphoglycerate-independent phosphoglycerate mutase [EC:5.4.2.12]                    |
| c_00000009473_304 | K15633 | Metabolism                           | Amino acid metabolism                        | Glycine, serine and threonine metabolism    | gpmI; 2,3-bisphosphoglycerate-independent phosphoglycerate mutase [EC:5.4.2.12]                    |
| c_00000009473_305 | K01689 | Metabolism                           | Carbohydrate metabolism                      | Glycolysis / Gluconeogenesis                | ENO, eno; enolase [EC:4.2.1.11]                                                                    |
| c_00000009473_305 | K01689 | Metabolism                           | Energy metabolism                            | Methane metabolism                          | ENO, eno; enolase [EC:4.2.1.11]                                                                    |
| c_00000009473_305 | K01689 | Genetic Information Processing       | Folding, sorting and degradation             | RNA degradation                             | ENO, eno; enolase [EC:4.2.1.11]                                                                    |
| c_00000009473_305 | K01689 | Environmental Information Processing | Signal transduction                          | HIF-1 signaling pathway                     | ENO, eno; enolase [EC:4.2.1.11]                                                                    |
| c_00000009473_306 | K00927 | Metabolism                           | Carbohydrate metabolism                      | Glycolysis / Gluconeogenesis                | PGK, pgk; phosphoglycerate kinase [EC:2.7.2.3]                                                     |
| c_00000009473_306 | K00927 | Metabolism                           | Energy metabolism                            | Carbon fixation in photosynthetic organisms | PGK, pgk; phosphoglycerate kinase [EC:2.7.2.3]                                                     |
| c_00000009473_306 | K00927 | Environmental Information Processing | Signal transduction                          | HIF-1 signaling pathway                     | PGK, pgk; phosphoglycerate kinase [EC:2.7.2.3]                                                     |
| c_00000009473_307 | K07098 | Not Included in Pathway or Brite     | Poorly characterized                         | Function unknown                            | K07098; uncharacterized protein                                                                    |
| c_00000009473_308 | K00134 | Metabolism                           | Carbohydrate metabolism                      | Glycolysis / Gluconeogenesis                | GAPDH, gapA; glyceraldehyde 3-phosphate dehydrogenase [EC:1.2.1.12]                                |
| c_00000009473_308 | K00134 | Metabolism                           | Energy metabolism                            | Carbon fixation in photosynthetic organisms | GAPDH, gapA; glyceraldehyde 3-phosphate dehydrogenase [EC:1.2.1.12]                                |
| c_00000009473_308 | K00134 | Environmental Information Processing | Signal transduction                          | HIF-1 signaling pathway                     | GAPDH, gapA; glyceraldehyde 3-phosphate dehydrogenase [EC:1.2.1.12]                                |
| c_00000009473_310 | K02967 | Genetic Information Processing       | Translation                                  | Ribosome                                    | RP-S2, MRPS2, rpsB; small subunit ribosomal protein S2                                             |
| c_00000009473_314 | K02909 | Genetic Information Processing       | Translation                                  | Ribosome                                    | RP-L31, rpmE; large subunit ribosomal protein L31                                                  |
| c_00000009473_318 | K02897 | Genetic Information Processing       | Translation                                  | Ribosome                                    | RP-L25, rplY; large subunit ribosomal protein L25                                                  |
| c_00000009473_326 | K03073 | Genetic Information Processing       | Folding, sorting and degradation             | Protein export                              | secE; preprotein translocase subunit SecE                                                          |
| c_00000009473_326 | K03073 | Environmental Information Processing | Membrane transport                           | Bacterial secretion system                  | secE; preprotein translocase subunit SecE                                                          |
| c_00000009473_326 | K03073 | Cellular Processes                   | Cellular community - prokaryotes             | Quorum sensing                              | secE; preprotein translocase subunit SecE                                                          |
| c_00000009473_328 | K02867 | Genetic Information Processing       | Translation                                  | Ribosome                                    | RP-L11, MRPL11, rplK; large subunit ribosomal protein L11                                          |
| c_00000009473_329 | K02863 | Genetic Information Processing       | Translation                                  | Ribosome                                    | RP-L1, MRPL1, rplA; large subunit ribosomal protein L1                                             |
| c_00000009473_331 | K01494 | Metabolism                           | Nucleotide metabolism                        | Pyrimidine metabolism                       | dcd, dCTP deaminase [EC:3.5.4.13]                                                                  |
| c_00000009473_332 | K01493 | Metabolism                           | Nucleotide metabolism                        | Pyrimidine metabolism                       | comEB, dCMP deaminase [EC:3.5.4.12]                                                                |
| c_00000009473_333 | K00943 | Metabolism                           | Nucleotide metabolism                        | Pyrimidine metabolism                       | tmk, dTYMK, dTMP kinase [EC:2.7.4.9]                                                               |
| c_00000009473_336 | K02434 | Genetic Information Processing       | Translation                                  | Aminoacyl-tRNA biosynthesis                 | gatB, PET112; aspartyl-tRNA(Asn)/glutamy-tRNA(Gln) amidotransferase subunit B [EC:6.3.5.6 6.3.5.7] |
| c_00000009473_337 | K00791 | Metabolism                           | Metabolism of terpenoids and polyketides     | Zeatin biosynthesis                         | miaA, TRIT1; tRNA dimethylallyltransferase [EC:2.5.1.75]                                           |
| c_00000009473_339 | K01868 | Genetic Information Processing       | Translation                                  | Aminoacyl-tRNA biosynthesis                 | TARS, thrS; threonyl-tRNA synthetase [EC:6.1.1.3]                                                  |
| c_00000009473_343 | K02337 | Genetic Information Processing       | Replication and repair                       | DNA replication                             | dnaE; DNA polymerase III subunit alpha [EC:2.7.7.7]                                                |
| c_00000009473_343 | K02337 | Genetic Information Processing       | Replication and repair                       | Mismatch repair                             | dnaE; DNA polymerase III subunit alpha [EC:2.7.7.7]                                                |
| c_00000009473_343 | K02337 | Genetic Information Processing       | Replication and repair                       | Homologous recombination                    | dnaE; DNA polymerase III subunit alpha [EC:2.7.7.7]                                                |
| c_00000009473_356 | K01890 | Genetic Information Processing       | Translation                                  | Aminoacyl-tRNA biosynthesis                 | FARSB, pheT; phenylalanyl-tRNA synthetase beta chain [EC:6.1.1.20]                                 |
| c_00000009473_357 | K01889 | Genetic Information Processing       | Translation                                  | Aminoacyl-tRNA biosynthesis                 | FARSA, pheS; phenylalanyl-tRNA synthetase alpha chain [EC:6.1.1.20]                                |
| c_00000009473_358 | K11749 | Cellular Processes                   | Cell growth and death                        | Cell cycle - Caulobacter                    | rseP; regulator of sigma E protease [EC:3.4.24.-]                                                  |
| c_00000009473_361 | K03744 | Not Included in Pathway or Brite     | Poorly characterized                         | General function prediction only            | lemA; LemA protein                                                                                 |
| c_00000009473_370 | K00560 | Metabolism                           | Nucleotide metabolism                        | Pyrimidine metabolism                       | thyA, TYMS; thymidylate synthase [EC:2.1.1.45]                                                     |
| c_00000009473_370 | K00560 | Metabolism                           | Metabolism of cofactors and vitamins         | One carbon pool by folate                   | thyA, TYMS; thymidylate synthase [EC:2.1.1.45]                                                     |
| c_00000009473_371 | K03655 | Genetic Information Processing       | Replication and repair                       | Homologous recombination                    | recG; ATP-dependent DNA helicase RecG [EC:3.6.4.12]                                                |
| c_00000009473_389 | K01784 | Metabolism                           | Carbohydrate metabolism                      | Galactose metabolism                        | galE, GALE; UDP-glucose 4-epimerase [EC:5.1.3.2]                                                   |
| c_00000009473_389 | K01784 | Metabolism                           | Carbohydrate metabolism                      | Amino sugar and nucleotide sugar metabolism | galE, GALE; UDP-glucose 4-epimerase [EC:5.1.3.2]                                                   |
| c_00000009473_392 | K04077 | Genetic Information Processing       | Folding, sorting and degradation             | RNA degradation                             | groEL, HSPD1; chaperonin GroEL                                                                     |
| c_00000009473_396 | K03217 | Genetic Information Processing       | Folding, sorting and degradation             | Protein export                              | yidC, spoIIJ, OXA1, ccfA; YidC/Oxa1 family membrane protein insertase                              |
| c_00000009473_396 | K03217 | Environmental Information Processing | Membrane transport                           | Bacterial secretion system                  | yidC, spoIIJ, OXA1, ccfA; YidC/Oxa1 family membrane protein insertase                              |
| c_00000009473_396 | K03217 | Cellular Processes                   | Cellular community - prokaryotes             | Quorum sensing                              | yidC, spoIIJ, OXA1, ccfA; YidC/Oxa1 family membrane protein insertase                              |
| c_00000009473_399 | K07460 | Not Included in Pathway or Brite     | Unclassified: genetic information processing | Replication and repair                      | yraN; putative endonuclease                                                                        |
| c_00000009473_405 | K01887 | Genetic Information Processing       | Translation                                  | Aminoacyl-tRNA biosynthesis                 | RARS, argS; arginyl-tRNA synthetase [EC:6.1.1.19]                                                  |
| c_00000009473_406 | K01866 | Genetic Information Processing       | Translation                                  | Aminoacyl-tRNA biosynthesis                 | YARS, tyrS; tyrosyl-tRNA synthetase [EC:6.1.1.1]                                                   |
| c_00000009473_407 | K01873 | Genetic Information Processing       | Translation                                  | Aminoacyl-tRNA biosynthesis                 | VARS, valS; valyl-tRNA synthetase [EC:6.1.1.9]                                                     |
| c_00000009473_414 | K00945 | Metabolism                           | Nucleotide metabolism                        | Pyrimidine metabolism                       | cnk; CMP/dCMP kinase [EC:2.7.4.25]                                                                 |
| c_00000009473_415 | K02884 | Genetic Information Processing       | Translation                                  | Ribosome                                    | RP-L19, MRPL19, rplS; large subunit ribosomal protein L19                                          |
| c_00000009473_417 | K03701 | Genetic Information Processing       | Replication and repair                       | Nucleotide excision repair                  | uvrA; excinuclease ABC subunit A                                                                   |
| c_00000009473_420 | K03075 | Genetic Information Processing       | Folding, sorting and degradation             | Protein export                              | secG; preprotein translocase subunit SecG                                                          |
| c_00000009473_420 | K03075 | Environmental Information Processing | Membrane transport                           | Bacterial secretion system                  | secG; preprotein translocase subunit SecG                                                          |
| c_00000009473_420 | K03075 | Cellular Processes                   | Cellular community - prokaryotes             | Quorum sensing                              | secG; preprotein translocase subunit SecG                                                          |
| c_00000009473_421 | K02035 | Cellular Processes                   | Cellular community - prokaryotes             | Quorum sensing                              | ABC.P.E.S. peptide/nickel transport system substrate-binding protein                               |
| c_00000009473_422 | K12574 | Genetic Information Processing       | Folding, sorting and degradation             | RNA degradation                             | rj; ribonuclease J [EC:3.1.-.-]                                                                    |
| c_00000009473_423 | K09815 | Environmental Information Processing | Membrane transport                           | ABC transporters                            | znuA; zinc transport system substrate-binding protein                                              |
| c_00000009473_424 | K09817 | Environmental Information Processing | Membrane transport                           | ABC transporters                            | znuC; zinc transport system ATP-binding protein [EC:7.2.2.-]                                       |
| c_00000009473_425 | K09816 | Environmental Information Processing | Membrane transport                           | ABC transporters                            | znuB; zinc transport system permease protein                                                       |
| c_00000009473_427 | K04564 | Environmental Information Processing | Signal transduction                          | MAPK signaling pathway - fly                | SOD2; superoxide dismutase, Fe-Mn family [EC:1.15.1.1]                                             |
| c_00000009473_427 | K04564 | Environmental Information Processing | Signal transduction                          | FoxO signaling pathway                      | SOD2; superoxide dismutase, Fe-Mn family [EC:1.15.1.1]                                             |
| c_00000009473_427 | K04564 | Cellular Processes                   | Transport and catabolism                     | Peroxisome                                  | SOD2; superoxide dismutase, Fe-Mn family [EC:1.15.1.1]                                             |
| c_00000009473_430 | K01937 | Metabolism                           | Nucleotide metabolism                        | Pyrimidine metabolism                       | pyrG, CTPS; CTP synthase [EC:6.3.4.2]                                                              |
| c_00000009473_431 | K23573 | Environmental Information Processing | Signaling molecules and interaction          | ECM-receptor interaction                    | DSPP; dentin sialophosphoprotein                                                                   |
| c_00000009473_433 | K03685 | Genetic Information Processing       | Translation                                  | Ribosome biogenesis in eukaryotes           | rnc, DROSHA, RNT1; ribonuclease III [EC:3.1.26.3]                                                  |
| c_00000009473_445 | K02945 | Genetic Information Processing       | Translation                                  | Ribosome                                    | RP-S1, rpsA; small subunit ribosomal protein S1                                                    |
| c_00000009473_464 | K13993 | Genetic Information Processing       | Folding, sorting and degradation             | Protein processing in endoplasmic reticulum | HSP20; HSP20 family protein                                                                        |
| c_00000009473_466 | K18346 | Environmental Information Processing | Signal transduction                          | Two-component system                        | vanW; vancomycin resistance protein VanW                                                           |
| c_00000009473_469 | K01358 | Cellular Processes                   | Cell growth and death                        | Cell cycle - Caulobacter                    | clpP, CLPP; ATP-dependent Clp protease, protease subunit [EC:3.4.21.92]                            |
| c_00000009473_470 | K06881 | Metabolism                           | Energy metabolism                            | Sulfur metabolism                           | nnaA; bifunctional oligoribonuclease and PAP phosphatase NnaA [EC:3.1.3.7 3.1.13.3]                |
| c_00000009473_474 | K02959 | Genetic Information Processing       | Translation                                  | Ribosome                                    | RP-S16, MRPS16, rpsP; small subunit ribosomal protein S16                                          |
| c_00000009473_477 | K06960 | Not Included in Pathway or Brite     | Poorly characterized                         | Function unknown                            | K06960; uncharacterized protein                                                                    |
